# Supplementary material
Source: publisher figshare collection journal article supplement (https://karger.figshare.com/articles/dataset/_/8108096)
Supplement: Supplementary file 1 [file 1]

## A Ferret Model of Encephalopathy of Prematurity

### Supplemental Material

Thomas Wood, Daniel Moralejo, Kylie Corry, Jessica M. Snyder, Christopher Traudt, Chad Curtis, Elizabeth Nance, Pratik Parikh, Sandra E. Juul.

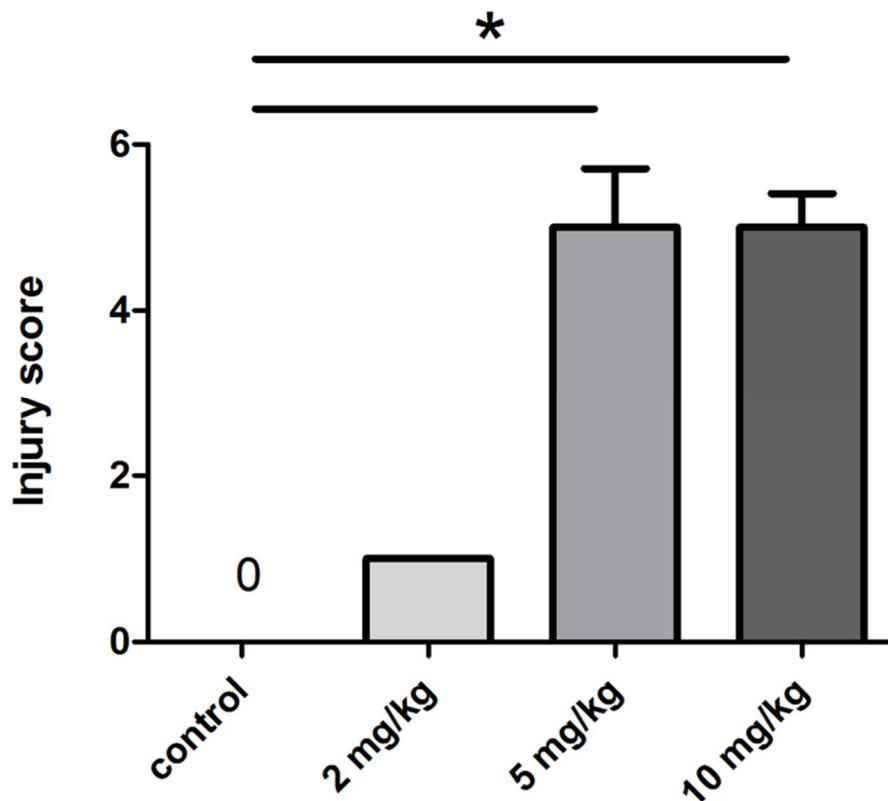

**Supplemental Figure 1. Injury after escalating LPS doses.** Ferrets treated with three doses of 2 mg/kg (n=3), 5 mg/kg (n=4) and 10 mg/kg (n=4) every 12 h at P9-P10 before hypoxia/hyperoxia were examined histologically (H&E staining) at P12. Increased inflammation within the meninges and to a lesser degree the neuropil was observed in all dose groups compared to untreated controls (n=4). Score comparison revealed significant differences between 5 mg/kg LPS and control and 10 mg/kg LPS and control, but no significant difference between 5 mg/kg and 10 mg/kg doses of LPS (Figure 2D). At 5 mg/kg and 10 mg/kg, rare acute microhemorrhages characterized by small areas of extravascular red blood cells were noted.

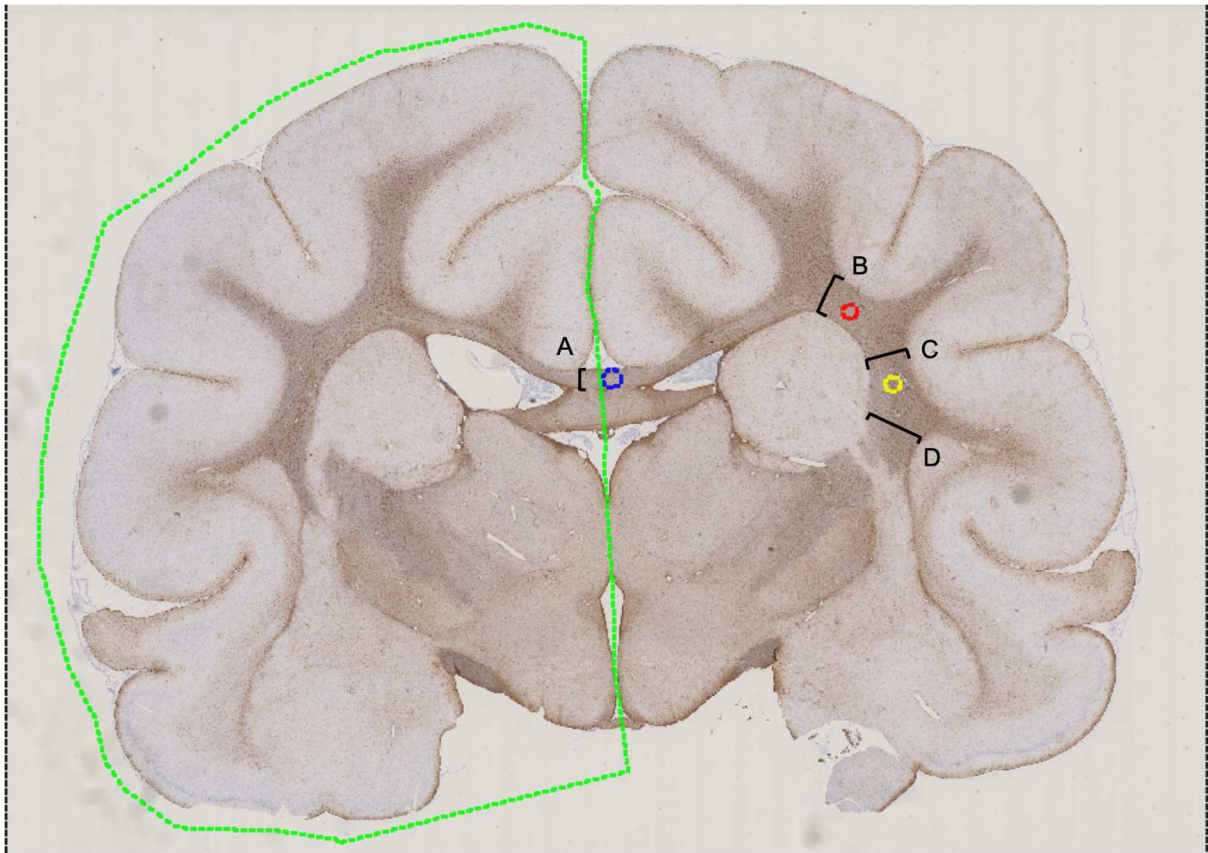

**Supplemental Figure 2. Quantitative immunohistochemistry.** Representative GFAP image showing regions of interest as taken to analyze MBP, Olig2, and GFAP staining intensity for a total hemisphere (**green**), corpus callosum (**blue**), internal capsule 1 (**red**), and internal capsule 2 (**yellow**). For white matter thickness, the corpus callosum (**A**), and three levels of the internal capsule (**B-D**) were measured.
