# Supplementary material
Source: publisher figshare collection journal article supplement (https://karger.figshare.com/articles/dataset/_/8108096)
Supplement: Supplementary file 2 [file 1]

**Supplemental Table 1. Iterative injury protocols.** Development of the model involved the iterative increase in LPS dose, changes in dose timing, and manipulating the delay between LPS doses and hypoxia. Initially, LPS alone was used. Subsequently a period of hypoxia was added, then a period of hyperoxia after hypoxia and, finally, a second period of hypoxia with continuous rectal temperature monitoring during the insult period. Data from the penultimate row is depicted in Supplemental Figure 1. The current protocol is detailed in the final row.

| Age at insult  | LPS                   | No. of LPs doses | Delay (last LPS dose to hypoxia) | Hypoxia          | Hyperoxia         | 2nd Hypoxia      | Waterbath temp during insult (°C) | Rectal temp during insult (°C)         |
|----------------|-----------------------|------------------|----------------------------------|------------------|-------------------|------------------|-----------------------------------|----------------------------------------|
| P9-P12         | 10mcg/kg/24h          | 4                | N/A                              | N/A              | N/A               | N/A              | N/A                               | N/A                                    |
| P9-P12         | 50-100mcg/kg/24h      | 3                | 24h                              | 8% for 4 h       | N/A               | N/A              | 35.7-37.5                         | N/A                                    |
| P9-P11         | 100mcg/kg/24h         | 3                | None                             | 6% for 6h        | N/A               | N/A              | 35.7-37.5                         | N/A                                    |
| P10            | 0.5-1mg/kg            | 1                | None                             | 6% for 4h        | N/A               | N/A              | 37                                | N/A                                    |
| P9-P10         | 1mg/kg/12h            | 1 vs 3           | None                             | 6% for 45min     | 100% for 6h       | N/A              | 37                                | N/A                                    |
| P9-P10         | 2 vs 5 vs 10mg/kg/12h | 3                | None                             | 10% for 2h       | 80% for 2h        | 10% for 2h       | 40                                | 37 (hypoxia)<br>38 (hyperoxia)         |
| <b>P10-P11</b> | <b>5mg/kg</b>         | <b>1</b>         | <b>4h</b>                        | <b>9% for 2h</b> | <b>60% for 2h</b> | <b>9% for 2h</b> | <b>40</b>                         | <b>37 (hypoxia)<br/>38 (hyperoxia)</b> |
